# Supplementary material for: High Efficiency Gene Correction in Hematopoietic Cells by Donor-Template-Free CRISPR/Cas9 Genome Editing
Source: PubMed Central journal article supplement (PMC5723376; doi:10.1016/j.omtn.2017.11.001), 2017-11-10
Supplement: mmc1.pdf [file mmc1.pdf]

**OMTN, Volume 10**

## **Supplemental Information**

**High Efficiency Gene Correction in Hematopoietic**

**Cells by Donor-Template-Free CRISPR/Cas9**

**Genome Editing**

**Duran Sürün, Joachim Schwäble, Ana Tomasovic, Roy Ehling, Stefan Stein, Nina Kurrle, Harald von Melchner, and Frank Schnütgen**

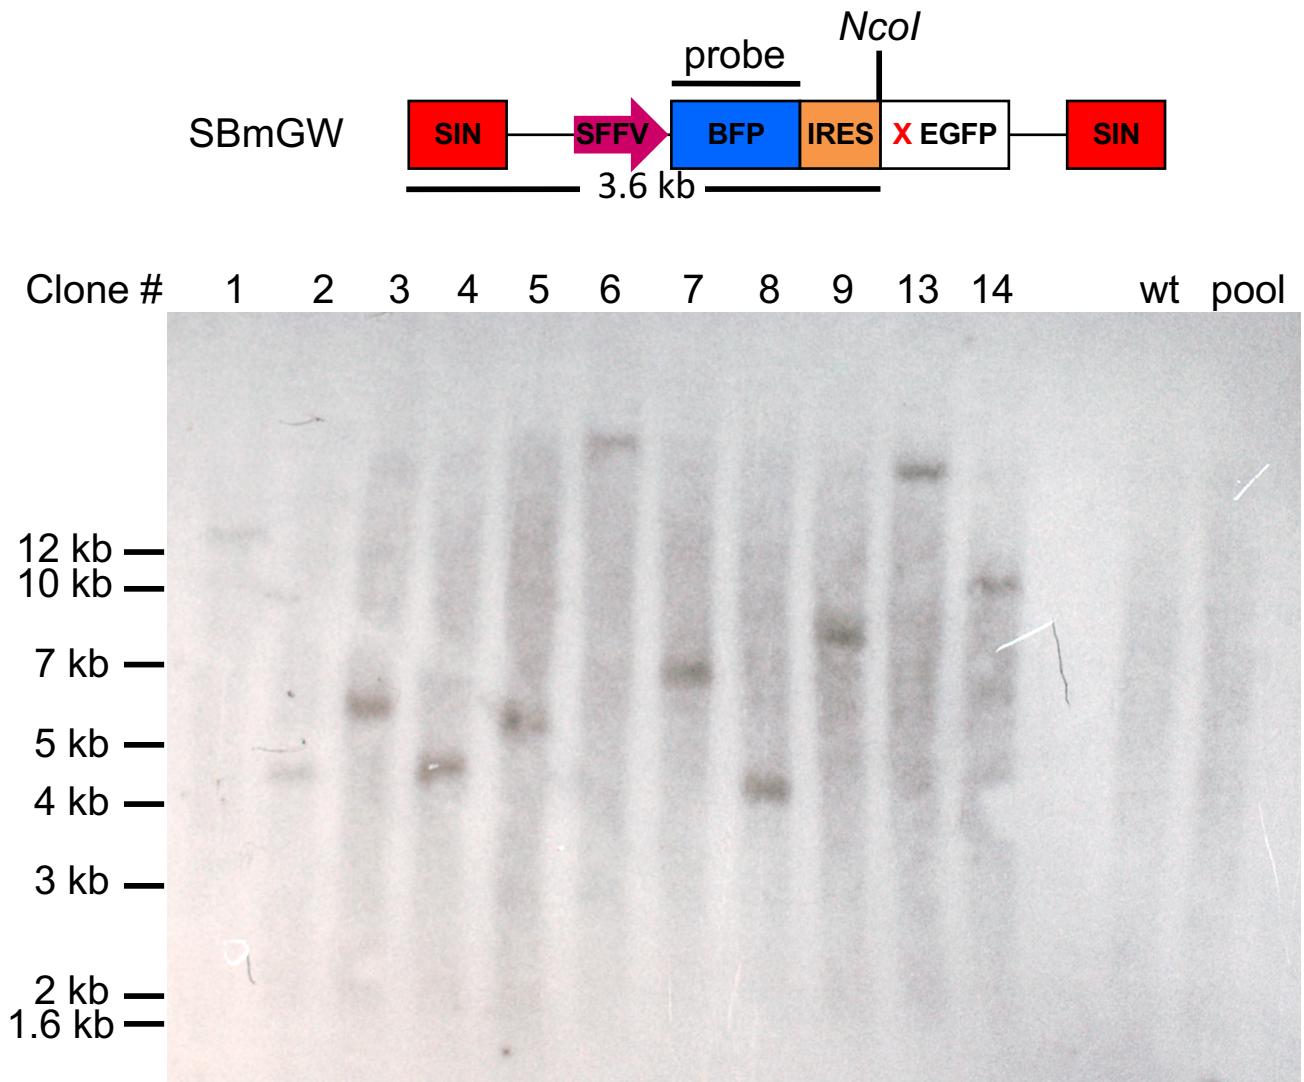

**Supplemental Figure 1:** Single copy integration of SBmGW lentiviruses in PLB cells. BFP+ SBmGW-PLB clones were isolated by limiting dilution and subjected to Southern blot analysis. *NcoI* restriction fragments of genomic DNAs of individual clones were resolved by agarose gel electrophoresis, transferred onto nylon membranes and hybridized to a  $^{32}\text{P}$ -labeled BFP probe.

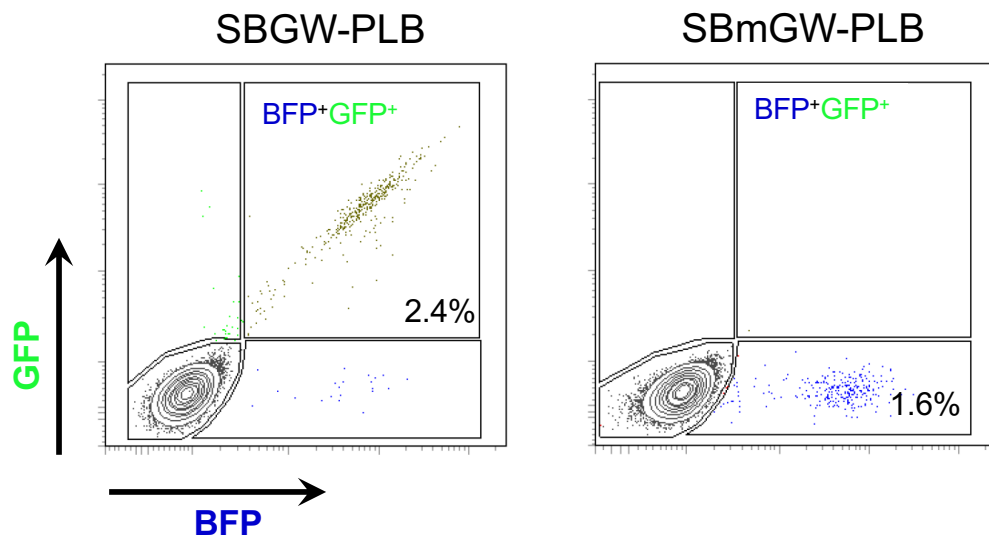

**Supplemental Figure 2:** FACS profiles of SBGW- and SBmGW-PLB reporter cells

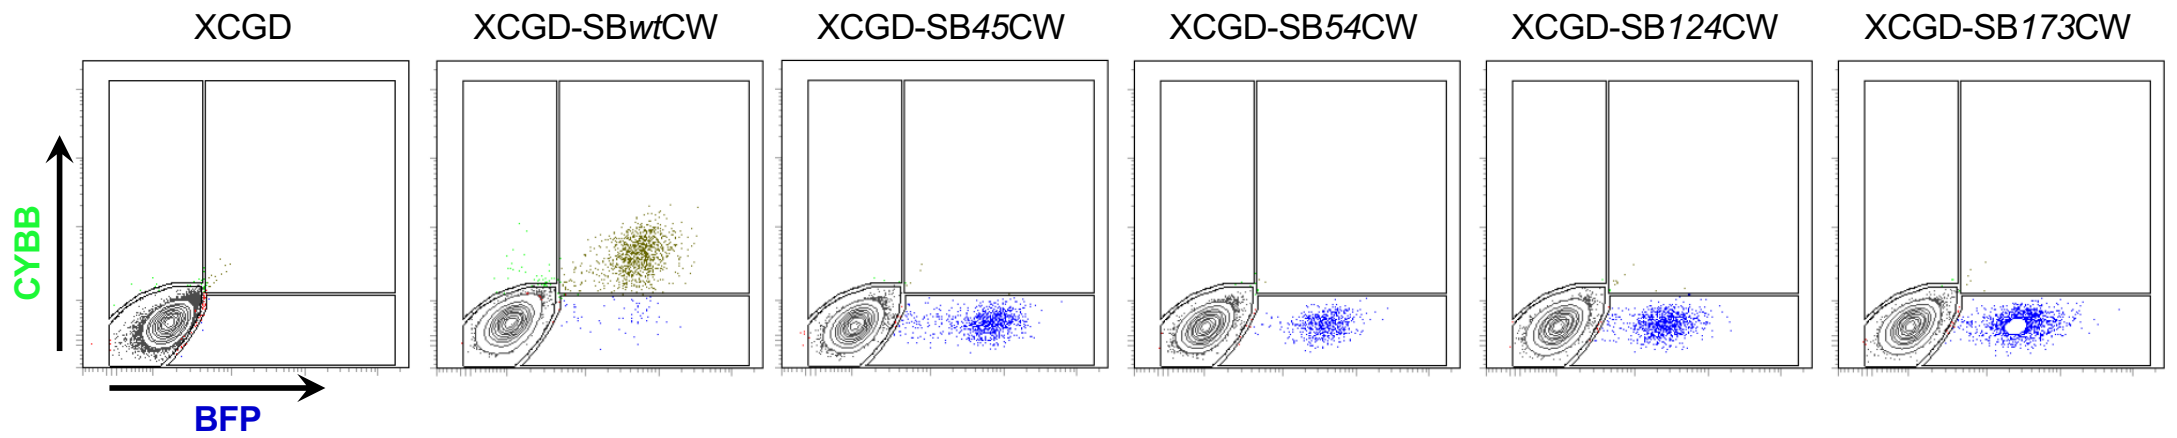

**Supplemental Figure 3:** FACS profiles of XCGD cells expressing wild-type and mutant *CYBB* cDNAs. Note that only XCGD-SBwtCW cells expressing wild type *CYBB* are double positive for BFP and *CYBB*.

|        |                                                           | Genotype |
|--------|-----------------------------------------------------------|----------|
| SB54CW | CCCGAAGCTGCTGGGCTCAGCACTGGCACTGGCCAGGGCCCTGCCGCTGCCTGAAC  |          |
| K1     | CCCGAAGCTGCTGGGCTCAGCACTGGCACTGG-CCAGGGCCCTGCCGCTGCCTGAAC | -1       |
| K2     | CCCGAAGCTGCTGGGCTCAGCACTGGCACTGG-CCAGGGCCCTGCCGCTGCCTGAAC | -1       |
| K3     | CCCGAAGCTGCTGGGCTCAGCACTGGCACTGG-CCAGGGCCCTGCCGCTGCCTGAAC | -1       |
| K4     | CCCGAAGCTGCTGGGCTCAGCACTGGCACTGG-CCAGGGCCCTGCCGCTGCCTGAAC | -1       |
| K5     | CCCGAAGCTGCTGGGCTCAGCACTGGCACTGGCCAGGGCCCTGCCGCTGCCTGAAC  | 0        |
| K6     | CCCGAAGCTGCTGGGCTCAGCACTGGCACTGG-CCGGGGCCCTGCCGCTGCCTGAAC | -1 (A>G) |
| K7     | CCCGAAGCTGCTGGGCTCAGCACTGGCACTGG-CCAGGGCCCTGCCGCTGCCTGAAC | -1       |
| K8     | CCCGAAGCTGCTGGGCTCAGCACTGGCACTGG-CCAGGGCCCTGCCGCTGCCTGAAC | -1       |
| K9     | CCCGAAGCTGCTGGGCTCAGCACTGGCACTGG-CCAGGGCCCTGCCGCTGCCTGAAC | -1       |
| K10    | CCCGAAGCTGCTGGGCTCAGCACTGGCACTGG-CCAGGGCCCTGCCGCTGCCTGAAC | -1       |
| K11    | CCCGAAGCTGCTGGGCTCAGCACTGGCACTGG-CCAGGGCCCTGCCGCTGCCTGAAC | -1       |
| K12    | CCCGAAGCTGCTGGGCTCAGCACTGGCACTGG-CCAGGGCCCTGCCGCTGCCTGAAC | -1       |
| K13    | CCCGAAGCTGCTGGGCTCAGCACTGGCACTGG-CCAGGGCCCTGCCGCTGCCTGAAC | -1       |
| K14    | CCCGAAGCTGCTGGGCTCAGCACTGGCACTGG-CCAGGGCCCTGCCGCTGCCTGAAC | -1       |
| K15    | CCCGAAGCTGCTGGGCTCAGCACTGGCACTGG-CCAGGGCCCTGCCGCTGCCTGAAC | -1       |
| K16    | CCCGAAGCTGCTGGGCTC-----CCAGGGCCCTGCCGCTGCCTGAAC           | -15      |
| K17    | CCCGAAGCTGCTGGGCTCAGCACTGGCACTGG-CCAGGGCCCTGCCGCTGCCTGAAC | -1       |
| K18    | CCCGAAGCTGCTGGGCTCAGCACTGGCACTGG-CCAGGGCCCTGCCGCTGCCTGAAC | -1       |
| K19    | CCCGAAGCTGCTGGGCTCAGCACTGGCACTGG-CCAGGGCCCTGCCGCTGCCTGAAC | -1       |
| K20    | CCCGAAGCTGCTGGGCTCAGCACTGGCACTGG-CCAGGGCCCTGCCGCTGCCTGAAC | -1       |
| K21    | CCCGAAGCTGCTGGGCTCAGCACTGGCACTG-CCAGGGCCCTGCCGCTGCCTGAAC  | -1       |
| K22    | CCCGAAGCTGCTGGGCTCAGCACTGGCACTGG-CCAGGGCCCTGCCGCTGCCTGAAC | -1       |

|         |                                                             | Genotype |
|---------|-------------------------------------------------------------|----------|
| SB173CW | CCCCGAGGGCGGCTGTACCTGGCTGTGACC----TGTGGCCGGCATCACCGGCGTGGT  |          |
| K1      | CCCCGAGGGCGGCTGTACCTGGCTGTGACC----TGTGGCCGGCATCACCGGCGTGGT  | 0        |
| K2      | CCCCGAGGGCGGCTGTACCTG-----GCCGGCATCACCGGCGTGGT              | -14      |
| K3      | CCCCGAGGGCGGCTGTACCTG-----GCCGGCATCACCGGCGTGGT              | -14      |
| K4      | CCCCGAGGGCGGCTGTACCTGGCTGTGA-----CCAGCATCACCGGCGTGGT        | -8       |
| K5      | CCCCGAGGGCGGCTGTACCTGGCTGTGA-----TGTGGCCGGCATCACCGGCGTGGT   | -6       |
| K6      | CCCCGAGGGCGGCTGTACCTGGCTG-----TGGCCGGCATCACCGGCGTGGT        | -8       |
| K7      | CCCCGAGGGCGGCTGTACCTGGCTGTGACCC---TGTGGCCGGCATCACCGGCGTGGT  | +1       |
| K8      | CCCCGAGGGCGGCTGTACCTGGCTGTGACCC---TGTGGCCGGCATCACCGGCGTGGT  | +1       |
| K9      | CCCCGAGGGCGGCTGTACCTGGCTGTGA-----CCGGCATCACCGGCGTGGT        | -8       |
| K10     | CCCCGAGGGCGGCTATACCTG-----TGTGGCCGGCATCACCGGCGTGGT          | -9       |
| K11     | CCCCGAGGGCGGCTGTACCTGGCTGTGACCAGGCTGTTGGCCGGCATCACCGGCGTGGT | +4       |
| K13     | CCCCGAGGGCGGCTGTACCTGGCTGTGACC----TGTGGCCGGCATCACCGGCGTGGT  | 0        |
| K14     | CCCCGAGGGCGGCTGTACCTGGCTGTGACCC---TGTGGCCGGCATCACCGGCGTGGT  | +1       |
| K15     | CCCCGAGGGCGGCTGTACCTGGCTGTGACC----TGTGGCCGGCATCACCGGCGTGGT  | 0        |
| K16     | CCCCGAGGGCGGCTGTACCTGGCTGTGA-----TGTGGCCGGCATCACCGGCGTGGT   | -2       |
| K17     | CCCCGAGGGCGGCTGTACCTGGCTGTGACCC---TGTGGCCGGCATCACCGGCGTGGT  | +1       |
| K18     | CCCCGAGGGCGGCTGTACCTGGCTGTGAC-----CACCGGCGTGGT              | -14      |
| K19     | CCCCGAGGGCGGCTGTACCTGGCTGTGACCT---TGTGGCCGGCATCACCGGCGTGGT  | +1       |
| K20     | CCCCGAGGGCGGCTGTACCTG-----GCCGGCATCACCGGCGTGGT              | -14      |
| K21     | CCCCGAGGGCGGCTGTACCTGGCTGTGACC----TGTGGCCGGCATCACCGGCGTGGT  | 0        |
| K22     | CCCCGAGGGCGGCTGTACCTGGCTGTGACCC---TGTGGCCGGCATCACCGGCGTGGT  | +1       |

**Supplementary Figure 4** : Indel sequences recovered by shot gun cloning from XCGD-SB54CW and XCGD-SB173CW cells.

**A**

|                        |                  |
|------------------------|------------------|
| GTACCTGGCTGTGACCTGTTGG | sgCYBB54         |
| CAGCACAGACACTGGCCCAAG  | chr14:+32749541  |
| CATCACTGGCTCTGGCCCATAG | chr12:-103703290 |
| CAACAGGGGCACTGGCCCATGG | chr1:+204799512  |
| TGGCAGTGGCACTGGCCCAAGG | chr19:-46999128  |
|                        |                  |
| CAGCACTGGCACTGGCCCAAGG | sgCYBB173        |
| TTACCTTGCTGTGACCTGTAG  | chr2:+186140924  |
| GTTCCTGGCTGTGATCTGTGAG | chr7:+73675051   |
| AAACCTAGCTGTGACCTGTAG  | chrX:-128220322  |
| CCAACTTGCTGTGACCTGTGGG | chr18:+24746359  |

**B**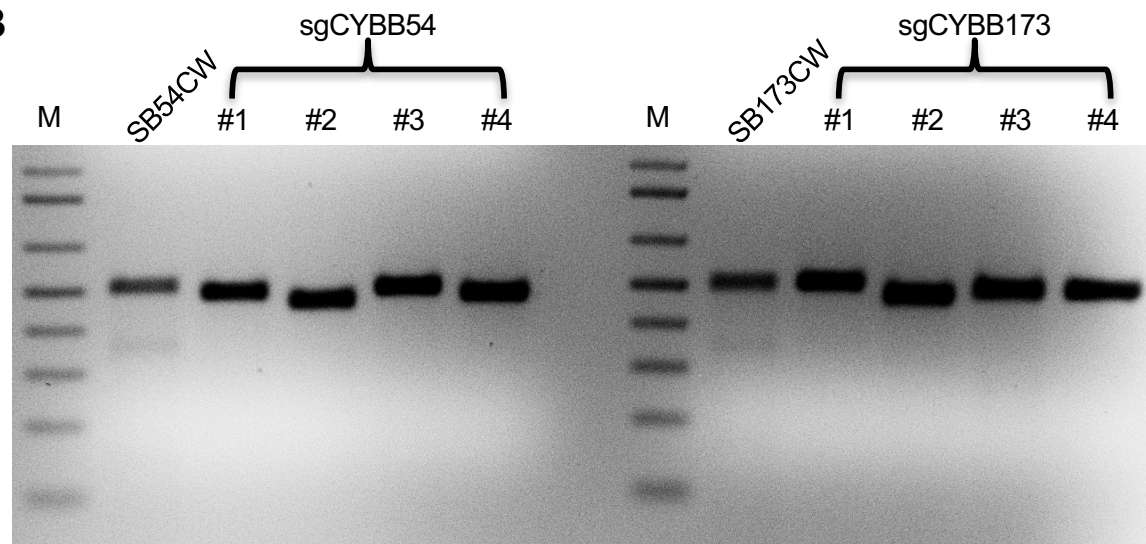

**Supplemental Figure 5:** Off target analysis in IDLV treated XCGD-54CW and XCGD-173CW cells. **A.** Top 4 off targets for sgCYBB54 and sgCYBB173 RNAs selected from the benchling.com website. **B.** Surveyor assay

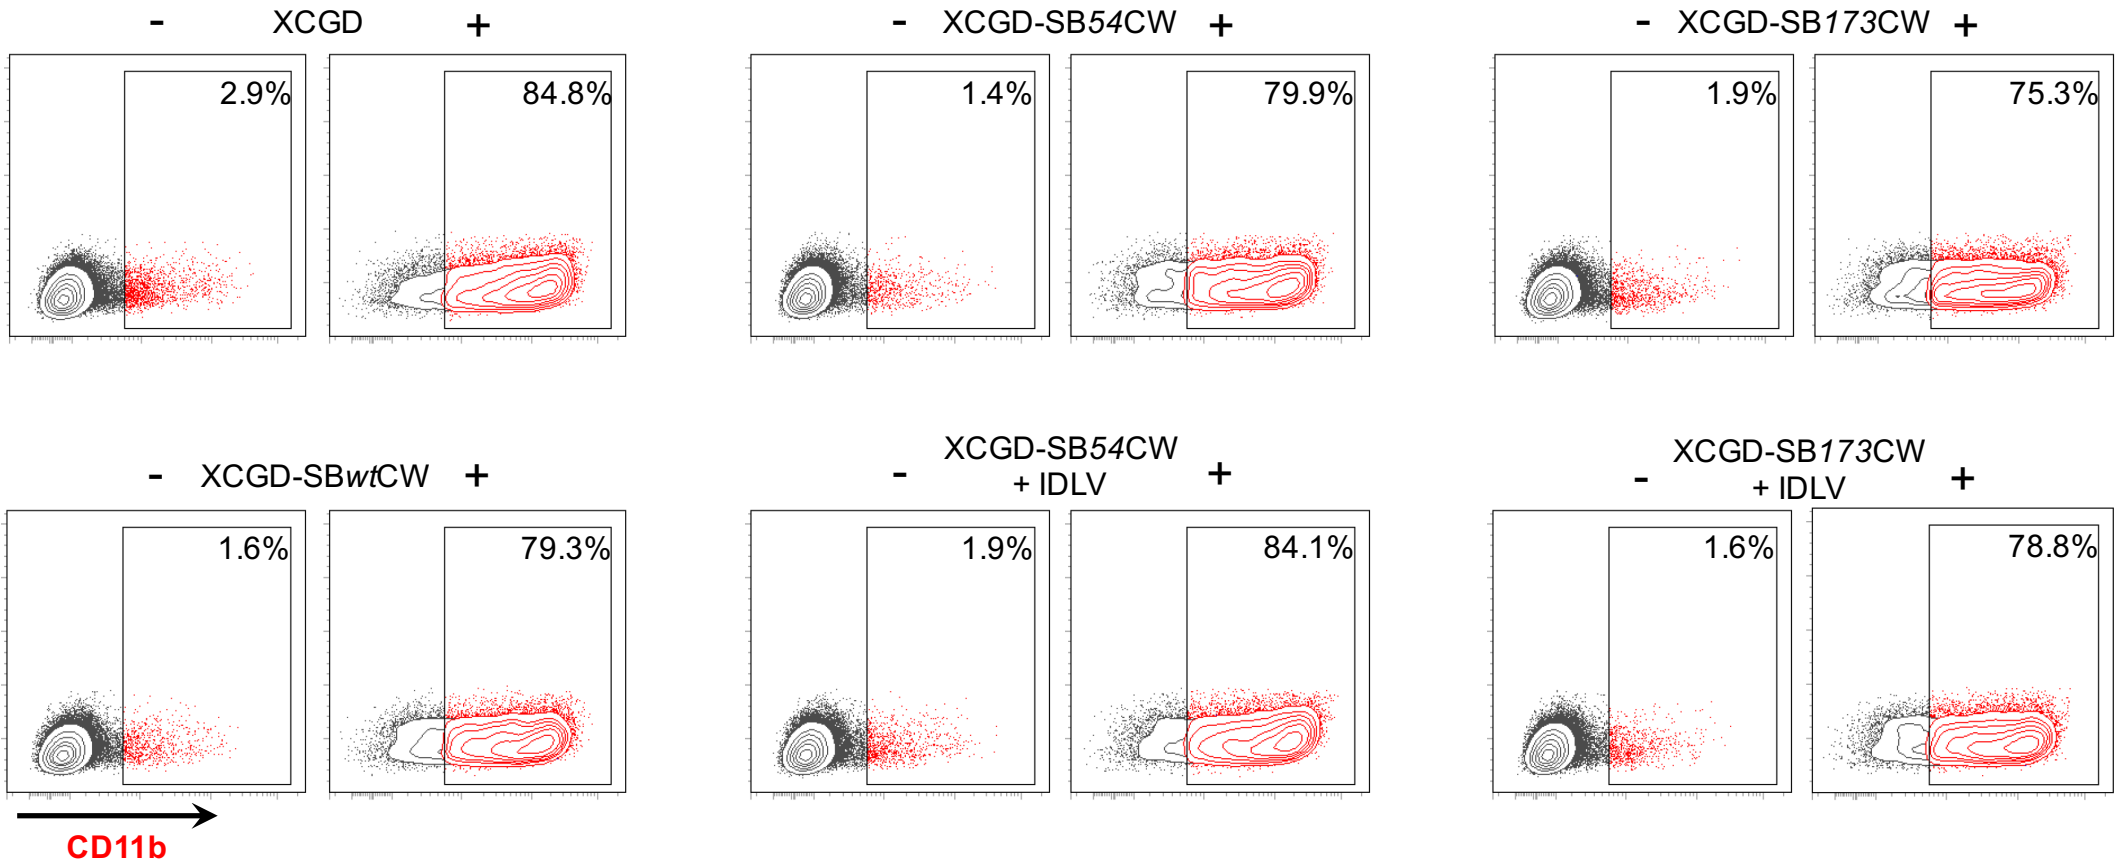

**Supplemental Figure 6:** Differentiation of XCGD cells after exposure to DMSO. Cells were incubated for 7 days with DMSO (+), stained with anti-CD11b antibody and analyzed by FACS.

|      |                                                                                           |       |
|------|-------------------------------------------------------------------------------------------|-------|
| E x3 | C GCC TCT TC TAG TCA GC ACT GGC AC TGG CCA <u>GGG</u> CC CCT GC AGC CTG CC TGA ATT TC AAC |       |
|      |                                                                                           | -13   |
| C 1  | C GCC TCT TC TAG TCA GC ACT GGC AC ---- -T GC AGC CTG CC TGA ATT TC AAC                   | -1    |
| C 2  | C GCC TCT TC TAG TCA GC ACT GGC AC TG- CCA GG GCC CCT GC AGC CTG CC TGA ATT TC AAC        | -1    |
| C 3  | C GCC TCT TC TAG TCA GC ACT GGC AC TG- CCA GG GCC CCT GC AGC CTG CC TGA ATT TC AAC        | 0     |
| C 4  | C GCC TCT TC TAG TCA GC ACT GGC AC TGG CCA GG GCC CCT GC AGC CTG CC TGA ATT TC AAC        | -1    |
| C 5  | C GCC TCT TC TAG TCA GC ACT GGC AC TG- CCA GG GCC CCT GC AGC CTG CC TGA ATT TC AAC        | -16 6 |
| C 6  | C GCC TCT TC TAG TCA GC ACT GGC AC TGG CT- -----                                          | -6    |
| C 7  | C GCC TCT TC TAG TCA GC ACT GG- --- --- CCA GG GCC CCT GC AGC CTG CC TGA ATT TC AAC       | -13   |
| C 8  | C GCC TCT TC TAG TCA GC ACT G--- --- --- -CC CCT GC AGC CTG CC TGA ATT TC AAC             | -20   |
| C 9  | C GCC TCT TC TAG TCA GC ACT GGC A- ----- CTG CC TGA ATT TC AAC                            | 0     |
| C 10 | C GCC TCT TC TAG TCA GC ACT GGC AC TGG CCA GG GCC CCT GC AGC CTG CC TGA ATT TC AAC        | -1    |
| C 11 | C GCC TCT TC TAG TCA GC ACT GGC AC TG- CCA GG GCC CCT GC AGC CTG CC TGA ATT TC AAC        | -2    |
| C 12 | C GCC TCT TC TAG TCA GC ACT GGC AC TG- -CA GG GCC CCT GC AGC CTG CC TGA ATT TC AAC        | -17   |
| C 13 | C GCC TCT TC TAG TCA GC ACT GGC AC TGG ----- -TG CC TGA ATT TC AAC                        | -1    |
| C 14 | C GCC TCT TC TAG TCA GC ACT GGC AC TA- CCA GG GCC CCT GC AGC CTG CC TGA ATT TC AAC        | -1    |
| C 15 | C GCC TCT TC TAG TCA GC ACT GGC AC TG- CCA GG GCC CCT GC AGC CTG CC TGA ATT TC AAC        | -12 0 |
| C 16 | ----- -AC                                                                                 | -1    |
| C 17 | C GCC TCT TC TAG TCA GC ACT GGC AC TG- CCA GG GCC CCT GC AGC CTG CC TGA ATT TC AAC        | -1    |
| C 18 | C GCC TCT TC TAG TCA GC ACT GGC AC TG- CCA GG GCC CCT GC AGC CTG CC TGA ATT TC AAC        | -14   |
| C 19 | C GCC TCT TC TAG TCA GC ACT GGC AC --- --- -T GC AGC CTG CC TGA ATT TC AAC                | -1    |
| C 20 | C GCC TCT TC TAG TCA GC ACT GGC AC TG- CCA GG GCC CCT GC AGC CTG CC TGA ATT TC AAC        | 0     |
| C 21 | C GCC TCT TC TAG TCA GC ACT GGC AC TGG CCA GG GCC CCT GC AGC CTG CC TGA ATT TC AAC        | -2    |
| C 22 | C GCC TCT TC TAG TCA GC ACT GGC AC T--- CCA GG GCC CCT GC AGC CTG CC TGA ATT TC AAC       | 0     |
| C 23 | C GCC TCT TC TAG TCA GC ACT GGC AC TGG CCA GG GCC CCT GC AGC CTG CC TGA ATT TC AAC        | -6    |
| C 24 | C GCC TCT TC TAG TCA GC ACT GGC AC TG- --- --- GCC CCT GC AGC CTG CC TGA ATT TC AAC       | -1    |
| C 25 | C GCC TCT TC TAG TCA GC ACT GGC AC TG- CCA GG GCC CCT GC AGC CTG CC TGA ATT TC AAC        |       |

## Genotype

|      |                                                                                           |       |
|------|-------------------------------------------------------------------------------------------|-------|
| E x6 | C TGA AGG AG GCC TGT AC CTG GCT GT GAC CCT GT <u>TGG</u> CAG GC ATC ACT GG AGT TGT CA TCA |       |
|      |                                                                                           | -26   |
| C 1  | C TGA AGG AG ----- -G CAG GC ATC ACT GG AGT TGT CA TCA                                    | 0     |
| C 2  | C TGA AGG AG GCC TGT AC CTG GCT GT GAC CCT GT TGG CAG GC ATC ACT GG AGT TGT CA TCA        | -14   |
| C 3  | C TGA AGG AG GCC TGT AC CTG GCT GT ----- GC ATC ACT GG AGT TGT CA TCA                     | 0     |
| C 4  | C TGA AGG AG GCC TGT AC CTG GCT GT GAC CCT GT TGG CAG GC ATC ACT GG AGT TGT CA TCA        | -15   |
| C 5  | C TGA AGG AG GCC TGT AC CTG G--- --- --- CAG GC ATC ACT GG AGT TGT CA TCA                 | -1    |
| C 6  | C TGA AGG AG GCC TGT AC CTG GCT GT GAC CC- GT TGG CAG GC ATC ACT GG AGT TGT CA TCA        | -47   |
| C 7  | C TGA AGG AG GCC TGT AC CTG -----                                                         | -19   |
| C 8  | C TGA AGG AG GCC TGT AC CAG ----- GC ATC ACT GG AGT TGT CA TCA                            | -27   |
| C 9  | C TGA AGG ----- -TA CAG GC ATC ACT GG AGT TGT CA TCA                                      | 0     |
| C 10 | C TGA AGG AG GCC TGT AC CTG GCT GT GAC CCT GT TGG CAG GC ATC ACT GG AGT TGT CA TCA        | 0     |
| C 11 | C TGA AGG AG GCC TGT AC CTG GCT GT GAC CCT GT TGG CAG GC ATC ACT GG AGT TGT CA TCA        | -1    |
| C 12 | C TGA AGG AG GCC TGT AC CTG GCT GT GAC CC- GT TGG CAG GC ATC ACT GG AGT TGT CA TCA        | -10   |
| C 13 | C TGA AGG AG GCC TGT AC CTG T--- --- --- GT TGG CAG GC ATC ACT GG AGT TGT CA TCA          | -19 8 |
| C 14 | -----                                                                                     | -16   |
| C 15 | C TGA AGG AG GCC TGT AC CTG G--- --- --- CAG GC ATC ACT GG AGT TGT CA TCA                 | -3    |
| C 16 | C TGA AGG AG GCC TGT AC CTG GCT GT GAC CC- --- ATG CAG GC ATC ACT GG AGT TGT CA TCA       | -14   |
| C 17 | C TGA AGG AG GCC TGT AC CTG GCT GT G--- --- --- -A ATC ACT GG AGT TGT CA TCA              | -1    |
| C 18 | C TGA AGG AG GCC TGT AC CTG GCT GT GAC CC- GT TGG CAG GC ATC ACT GG AGT TGT CA TCA        | 0     |
| C 19 | C TGA AGG AG GCC TGT AC CTG GCT GT GAC CCT GT TGG CAG GC ATC ACT GG AGT TGT CA TCA        | -8    |
| C 20 | C TGA AGG AG GCC TGT AC CTG GC- --- --- -T GT TGG CAG GC ATC ACT GG AGT TGT CA TCA        | -5    |
| C 21 | C TGA AGG AG GCC TGT AC CTG GCT GT --- --- -T GT TGG CAG GC ATC ACT GG AGT TGT CA TCA     | -1    |
| C 22 | C TGA AGG AG GCC TGT AC CTG GCT GT GAC CC- GT TGG CAG GC ATC ACT GG AGT TGT CA TCA        | -8    |
| C 23 | C TGA AGG AG GCC TGT AC CTG GCT GT GAC CC- --- --- -G GC ATC ACT GG AGT TGT CA TCA        | 0     |
| C 24 | C TGA AGG AG GCC TGT AC CTG GCT GT GAC CCT GT TGG CAG GC ATC ACT GG AGT TGT CA TCA        | -6    |
| C 25 | C TGA AGG AG GCC TGT AC CTG GCT G- --- --- -T GT TGG CAG GC ATC ACT GG AGT TGT CA TCA     |       |

**Supplemental Figure 7:** Indel sequences recovered by shot gun cloning from LC-sgEx3- and LC-sgEx6-LV transduced cells.



Supplemental Table 1: Oligo nucleotides used in this study

| Oligo                                    |                              | Sequence (5' -3')                                          |
|------------------------------------------|------------------------------|------------------------------------------------------------|
| <b>Cloning of EGFP sgRNAs</b>            |                              |                                                            |
| BH001                                    | g32DG1 s                     | CACCGGAGGAAGTTCACCGGCG                                     |
| BH002                                    | g32DG1 as                    | AAACGTGAACAGTTCCTCGCCCTC                                   |
| BH003                                    | g32DG2 s                     | CACCGGAGGAAGTTCACCGGCG                                     |
| BH004                                    | g32DG2 as                    | AAACCGCCGGTGAACAGTTCCTCC                                   |
| BH037                                    | g32DG1.4 s                   | CACCGGGCGAGGAAGTTCCTCAC                                    |
| BH038                                    | g32DG1.4 as                  | AAACGTGAACAGTTCCTCGCCCTC                                   |
| BH039                                    | g32DG1.7 s                   | CACCGAAGGGCGAGGAAGTTCAC                                    |
| BH040                                    | g32DG1.7 as                  | AAACGTGACAGTTCCTCGCCCTTC                                   |
| BH041                                    | g32DG2.3 s/<br>sgEGFP2.3 s   | CACCGGGAAGTTCACCGCGGCG                                     |
| BH042                                    | g32DG2.3 as/<br>sgEGFP2.3 as | AAACCGCCGGTGAACAGTTCCTCC                                   |
| BH043                                    | g32DG2.5 s                   | CACCGCGAGGAAGTTCACCGGCG                                    |
| BH044                                    | g32DG2.5 as                  | AAACCGCCGTGAACAGTTCCTCGC                                   |
| <b>Cloning of CYBB sgRNAs</b>            |                              |                                                            |
| BH137                                    | sgCYBB54 s                   | CACCGCAGCACTGGCACTGGCCCA                                   |
| BH138                                    | sgCYBB54 as                  | AAACTGGGCCAGTGCAGTGTCTGC                                   |
| BH139                                    | sgCYBB173 s                  | CACCGGTACCTGGCTGTGACCTGT                                   |
| BH140                                    | sgCYBB173 as                 | AAACACAGGTCACAGCCAGGTACC                                   |
| BH141                                    | sgCYBB45 s                   | CACCGTTTACACAAGAAAACGTCT                                   |
| BH142                                    | sgCYBB45 as                  | AAACAGACGTTTTTCTGTGTAAC                                    |
| BH143                                    | sgCYBB124 s                  | CACCGACATCTATTTAATGTGTAA                                   |
| BH144                                    | sgCYBB124 as                 | AAACTTACACATTAATAGATGTC                                    |
| <b>Generation of EGFP mutant vectors</b> |                              |                                                            |
| SFHR037                                  | SBmGW s                      | ATGGTGTCCAAGGGCGAGGAAGTTCACCGCGGCGTGGTGCCCATCCTG           |
| SFHR038                                  | SBmGW as                     | ATGGGCACCACGCCGCGGTGAACAGTTCCTCGCCCTTGGACACCATGGTT         |
| SFHR046                                  | SBmGW-K6 s                   | ATGGTGTCCAAGGGCGAGGAAGTTCACCGTGGTGCCCATCCTG                |
| SFHR047                                  | SBmGW-K6 as                  | ATGGGCACCACGGTGAACAGTTCCTCGCCCTTGGACACCATGGTT              |
| SFHR048                                  | SBmGW-K16 s                  | ATGGTGTCCAAGGGCGAGGAAGTTCACCGCGAGCGTGGTGCCCATCCTG          |
| SFHR049                                  | SBmGW-K16 as                 | ATGGGCACCACGTCGCGGTGAACAGTTCCTCGCCCTTGGACACCATGGTT         |
| SFHR050                                  | SBmGW-K18 s                  | ATGGTGTCCAAGGGCGAGGAAGTTCACCGCGGCGTGGTGCCCATCCTG           |
| SFHR051                                  | SBmGW-K18 as                 | ATGGGCACCACGCCGCGGTGAACAGTTCCTCGCCCTTGGACACCATGGTT         |
| SFHR052                                  | SBmGW-K29 s                  | ATGGTGTCCAAGGGCGAGGAAGTTCACCGCGGCGCCCATCCTG                |
| SFHR053                                  | SBmGW-K29 as                 | ATGGGCACCAGGTGAACAGTTCCTCGCCCTTGGACACCATGGTT               |
| SFHR054                                  | SBmGW-K33 s                  | ATGGTGTCCAAGGGCGAGGAAGTTCACCGCGGCGTGGTGCCCATCCTG           |
| SFHR055                                  | SBmGW-K33 as                 | ATGGGCACCAGCGCCGTTGAACAGTTCCTCGCCCTTGGACACCATGGTT          |
| <b>Generation of CYBB mutant vectors</b> |                              |                                                            |
| BH111                                    | SB173CW s                    | GGGCGGCTGTACCTGGCTGTGACCTGTGGCCGGCATCACCGGCGTG             |
| BH112                                    | SB173CW as                   | CACGCCGGTGTATGCCGGCAACAGGTCACAGCCAGGTACAGGCCGCC            |
| BH113                                    | SB54CW s                     | GCTGCTGGGCTCAGCATGGCAGTGGCCAGGGCCCTGCCGCTGCCTGAA           |
| BH114                                    | SB54CW as                    | TTCAGGCAGCCGCGAGGGCCCTGGGCCAGTGCCAGTGTGAGCCACAGCAGC        |
| BH121                                    | SB124CW s                    | GCGCCATCCACACCATCGCACATCTATTTAATGTGTAATGGTGCCTGAACGCCGGGTG |
| BH122                                    | SB124CW as                   | CACCGGGCGTTCACGCACCATTAACATTAATAGATGTGCGATGGTGTGGATGGCGC   |
| BH123                                    | SB45CW s                     | CGACATCCCCCAAGTCTTTTTACACAAGAAAACGTCTTGGCAGCGCCCTGGCCCTGG  |
| BH124                                    | SB45CW as                    | CCAGGGCCAGGGCGCTGCCAAGACGTTTTCTTGTGTAAGAAGTGGGGGGATGTCG    |
| <b>Shotgun cloning</b>                   |                              |                                                            |
| AR36                                     | Shotg HPRT s                 | TCCCTTCATAGAGACAAGGAATG                                    |
| AR163                                    | Shotg HPRT as                | CCTGGGTTCTACCCAGCACAG                                      |
| AR102                                    | Shotg EGFP as                | TCATGTGGTCTGGGTATCTG                                       |
| SFHR20                                   | Shotg EGFP as                | CTTGTACAGCTCGTCCATGC                                       |
| SFHR43                                   | Shotg IRES s                 | TCTGTAGCGACCTTTGCAG                                        |
| BH234                                    | Shotg CYBB as                | AGGATCAGGCACAGGGTGTAT                                      |
| <b>Surveyor assay</b>                    |                              |                                                            |
| BH229                                    | Svyr45/54 s                  | TGGCTCTCCTCAAGCGTATT                                       |
| BH230                                    | Svyr45/54 as                 | CCATCTTGTGGAAGGTCAGG                                       |
| BH231                                    | Svyr173 s                    | CACCTGTTCAACGTGGAGTG                                       |
| BH232                                    | Svyr173 as                   | CTCGCACAGGTACAGGAACA                                       |
| BH233                                    | Svyr124 s                    | AACGTGTTCTGTTCGTGTG                                        |
| BH234                                    | Svyr124 as                   | AGGATCAGGCACAGGGTGTAT                                      |
| SFHR 135                                 | Svyr54_off1 s                | ATTCCTTTCAACGCTAGCCTTC                                     |
| SFHR 136                                 | Svyr54_off1 as               | GTACATTTGTTTGCCATACCG                                      |
| SFHR 137                                 | Svyr54_off2 s                | AAGCCATGGTCCAAAATCCTG                                      |
| SFHR 138                                 | Svyr54_off2 as               | CCTGTTGTTACAGCTCTATGT                                      |

|         |                 |                            |
|---------|-----------------|----------------------------|
| SFHR141 | Svyr54_off3 s   | TGCAGGATCTGGTCCCTAATC      |
| SFHR142 | Svyr54_off3 as  | GGAATCTCCCATCCTAGCCTAG     |
| SFHR143 | Svyr54_off4 s   | CGGTCGTTGATTTCTGAGGAG      |
| SFHR144 | Svyr54_off5 as  | ACAGAGCCTTGGTCTCATGA       |
| SFHR145 | Svyr173_off1 s  | ACCCACTACGCACATATATATGC    |
| SFHR146 | Svyr173_off1 as | TAATGACCTGCAAACAACCTAC     |
| SFHR147 | Svyr173_off2 s  | CTCTGTGTTTCAGCTCCAGC       |
| SFHR148 | Svyr173_off2 as | GTGATTCACAAACAAGGAGGTG     |
| SFHR151 | Svyr173_off3 s  | CTTTGGCTCTGATGTTATATCTGTAG |
| SFHR152 | Svyr173_off3 as | TCATCAGCATATCGTCTTGCC      |
| SFHR153 | Svyr173_off4 s  | ACTTCTGCTTCAGGAATTGCC      |
| SFHR154 | Svyr173_off4 as | CTACTGGTGCCAGCAAAGAC       |

| <b>Mutation</b> | <b>DNA change</b> | <b>Protein Alteration</b> | <b>Accession Number</b> | <b>sgRNA Sequence</b>            |
|-----------------|-------------------|---------------------------|-------------------------|----------------------------------|
| SB54CW          | c.159dupC         | p.R54fs                   | A53X102                 | CAGCACTGGCACTGG <b>C</b> CCAGGG  |
| SB173CW         | c.517delC         | p.L173fs                  | L173X188                | GTACCTGGCTGTGACC- <b>T</b> GTTGG |
| SB124CW         | c.370G>T          | p.E124X                   | E124X                   | ACATCTATTTAATGTG <b>T</b> AATGG  |
| SB45CW          | c.134T>G          | p.L45R                    | L45R                    | TTTACACAAGAAAAC <b>G</b> TCTTGG  |

**Supplemental Table 2:** Selected *CYBB* disease mutations and nucleotide sequences of the *CYBB* targeting sgRNAs.
